# Supplementary material
Source: ML conference proceedings conference paper supplement (https://openaccess.thecvf.com/content/WACV2025/html/Gao_Automated_Patient_Positioning_WACV_2025_paper.html)
Supplement: Supplementary file 1 [file Gao_Automated_Patient_Positioning_WACV_2025_supplemental.pdf]

## Automated Patient Positioning with Learned 3D Hand Gestures (Supplementary)

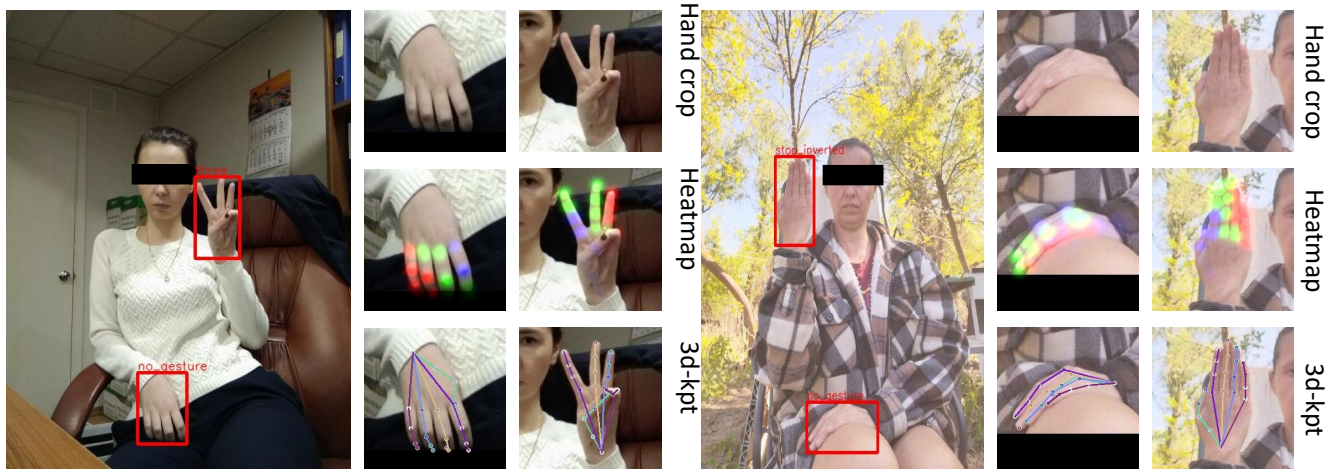

Figure S1. Qualitative results of the proposed method on the HaGRID [10], which includes 18 gesture classes in total. The left example shows the detection and recognition of gestures 'three' and 'no\_gesture', and the right example shows the detection and recognition of gestures 'stop\_inverted' and 'no\_gesture'
